# Supplementary material
Source: publisher figshare collection journal article supplement (https://asha.figshare.com/articles/dataset/_/14963922)
Supplement: Supplementary file 1 [file 1]

**Supplemental Material S3.** Standardized parameter estimates (with 95% confidence intervals) for specific (residual) influences of additive genetic (A), shared environmental (C) and nonshared environmental (E) effects on individual formal language measures at Home Visits (HVs) 5–7.

|     | A              | C              | E              |
|-----|----------------|----------------|----------------|
| HV5 |                |                |                |
| TNL | .50 (.00, .62) | .11 (.00, .51) | .73 (.64, .83) |
| RS  | .17 (.00, .27) | .00 (.00, .21) | .36 (.30, .42) |
| USP | .50 (.00, .61) | .00 (.00, .47) | .66 (.57, .77) |
| WC  | .30 (.00, .54) | .34 (.00, .50) | .60 (.52, .68) |
| HV6 |                |                |                |
| TNL | .37 (.00, .58) | .18 (.00, .47) | .79 (.68, .89) |
| RS  | .10 (.00, .23) | .00 (.00, .18) | .39 (.33, .44) |
| USP | .22 (.00, .58) | .40 (.00, .55) | .70 (.61, .79) |
| WC  | .49 (.26, .58) | .00 (.00, .33) | .49 (.41, .58) |
| HV7 |                |                |                |
| TNL | .00 (.00, .43) | .24 (.00, .40) | .82 (.73, .89) |
| RS  | .23 (.00, .32) | .00 (.00, .22) | .36 (.30, .43) |
| USP | .49 (.00, .68) | .26 (.00, .58) | .71 (.60, .83) |
| WC  | .00 (.00, .44) | .37 (.00, .45) | .55 (.48, .62) |

*Note.* Individual formal language measures are Test of Narrative Language (TNL; Gillam & Pearson, 2004), Clinical Evaluation of Language Fundamentals–Fourth Edition (CELF) Recalling Sentences subtest (RS; Semel, Wiig, & Secord, 2003), CELF Understanding Spoken Paragraphs subtest, CELF Word Classes 2 Receptive and Expressive subtest (WC).

## References

- Gillam, R. B., & Pearson, N. A. (2004). *Test of Narrative Language: Examiner’s manual*. Austin, TX: Pro-Ed.
- Semel, E., Wiig, E. H., & Secord, W. A. (2003). *Clinical Evaluation of Language Fundamentals–Fourth Edition*. San Antonio, TX: The Psychological Corporation.
