# Supplementary material
Source: publisher figshare collection journal article supplement (https://asha.figshare.com/articles/dataset/_/14963922)
Supplement: Supplementary file 2 [file 1]

**Supplemental Material S1.** Confirmatory model fit statistics for phenotypic latent factor models of language measures at Home Visits 5–7.

| Model               | Chi-square test statistics |           |          | Relative fit statistics<br>(lower score = better-fitting model) |         | Absolute fit statistics<br>(RMSEA < .10 and CFI > .95 = better-fitting models) |      |
|---------------------|----------------------------|-----------|----------|-----------------------------------------------------------------|---------|--------------------------------------------------------------------------------|------|
|                     | $\chi^2$                   | <i>df</i> | <i>p</i> | AIC                                                             | BIC     | RMSEA                                                                          | CFI  |
| <b>Home Visit 5</b> |                            |           |          |                                                                 |         |                                                                                |      |
| 1 factor            | 175.72                     | 14        | < .01    | 4021.14                                                         | 4096.32 | 0.21                                                                           | 0.79 |
| 2 factor_v1         | 31.76                      | 13        | < .01    | 3870.83                                                         | 3949.59 | 0.07                                                                           | 0.98 |
| 2 factor_v2         | 67.09                      | 13        | < .01    | 3909.04                                                         | 3987.80 | 0.13                                                                           | 0.93 |
| <b>Home Visit 6</b> |                            |           |          |                                                                 |         |                                                                                |      |
| 1 factor            | 228.63                     | 14        | < .01    | 3892.48                                                         | 3965.84 | 0.25                                                                           | 0.72 |
| 2 factor_v1         | 26.55                      | 13        | .01      | 3707.13                                                         | 3783.98 | 0.07                                                                           | 0.98 |
| 2 factor_v2         | 73.00                      | 13        | .01      | 3753.98                                                         | 3830.83 | 0.14                                                                           | 0.92 |
| <b>Home Visit 7</b> |                            |           |          |                                                                 |         |                                                                                |      |
| 1 factor            | 223.93                     | 14        | .01      | 3745.95                                                         | 3820.48 | 0.24                                                                           | 0.75 |
| 2 factor_v1         | 61.18                      | 13        | .01      | 3593.45                                                         | 3671.53 | 0.12                                                                           | 0.94 |
| 2 factor_v2         | 86.24                      | 13        | .01      | 3618.02                                                         | 3696.10 | 0.15                                                                           | 0.91 |

*Note.* AIC = Akaike information criterion; BIC = Bayesian information criterion; RMSEA = root mean square error of approximation; CFI = comparative fit index; 1 factor = all measures load on single latent language factor; 2 factor\_v1 = one latent factor indexed by mean length of utterance (MLU), number of total words on 30 communication units (C-units) (NTW-30), and number of different words on 30 C-units (NDW-30), second latent factor indexed by Test of Narrative Language (TNL; Gillam & Pearson, 2004), Clinical Evaluation of Language Fundamentals–Fourth Edition Recalling Sentences subtest (CELF-4-RS; Semel, Wiig, & Secord, 2003), CELF Understanding Spoken Paragraphs subtest (CELF-4-USP), CELF Word Classes 2 Receptive and Expressive subtest (CELF-4-WC); 2 factor\_v2 = one latent factor indexed by MLU, NTW-30, NDW-30 and TNL, second latent factor indexed by CELF-4-RS, CELF-4-USP, CELF-4-WC factor.

## References

- Gillam, R. B., & Pearson, N. A. (2004). *Test of Narrative Language: Examiner's manual*. Austin, TX: Pro-Ed.
- Semel, E., Wiig, E. H., & Secord, W. A. (2003). *Clinical Evaluation of Language Fundamentals–Fourth Edition*. San Antonio, TX: The Psychological Corporation.
