# Supplementary material
Source: publisher figshare collection journal article supplement (https://asha.figshare.com/articles/dataset/_/14963922)
Supplement: Supplementary file 3 [file 1]

**Supplemental Material S2.** Standardized parameter estimates (with 95% confidence intervals) for specific (residual) influences of additive genetic (A), shared environmental (C) and nonshared environmental (E) effects on individual productive language measures at Home Visits (HVs) 5–7.

|     | A              | C              | E              |
|-----|----------------|----------------|----------------|
| HV5 |                |                |                |
| MLU | .09 (.00, .25) | .00 (.00, .21) | .51 (.44, .56) |
| NTW | .00 (.00, .14) | .00 (.00, .12) | .14 (.00, .23) |
| NDW | .00 (.00, .25) | .16 (.00, .24) | .46 (.40, .51) |
| HV6 |                |                |                |
| MLU | .26 (.00, .37) | .00 (.00, .29) | .49 (.42, .56) |
| NTW | .00 (.00, .16) | .00 (.00, .16) | .19 (.07, .26) |
| NDW | .27 (.00, .35) | .07 (.00, .29) | .35 (.28, .43) |
| HV7 |                |                |                |
| MLU | .08 (.00, .35) | .27 (.00, .36) | .39 (.33, .55) |
| NTW | .00 (.00, .10) | .00 (.00, .08) | .07 (.00, .16) |
| NDW | .09 (.00, .26) | .17 (.00, .24) | .32 (.26, .42) |

*Note.* Individual productive language measures are mean length of utterance (MLU), number of total words (NTW), and number of different words (NDW).
