# Supplementary material
Source: publisher figshare collection journal article supplement (https://asha.figshare.com/articles/dataset/_/14963922)
Supplement: Supplementary file 4 [file 1]

**Supplemental Material S5.** Fit statistics comparing the full model for Formal language (presented in the article) and two nested submodels.

|                                                                                                              | Chi-square test statistics |           |          | Relative fit statistics (lower score = better-fitting model) |            |
|--------------------------------------------------------------------------------------------------------------|----------------------------|-----------|----------|--------------------------------------------------------------|------------|
|                                                                                                              | <i>-2LL</i>                | <i>df</i> | <i>p</i> | <b>AIC</b>                                                   | <b>BIC</b> |
| <b>Model 1.</b> Full model: decomposition of latent factors and residuals into A, C, E                       | 11137.77                   | 5232      | < .01    | 673.77                                                       | -8977.86   |
| <b>Model 2.</b> Decomposition of latent factors only; residuals included but are not decomposed into A, C, E | 11235.42                   | 5250      | < .01    | 735.42                                                       | -8979.08   |
| <b>Model 3.</b> C effects on latent factors constrained to zero; decomposition of residuals into A, C, E*    | 11138.73                   | 5238      | < .01    | 662.73                                                       | -8994.06   |

*Note.* AIC = Akaike information criterion; BIC = Bayesian information criterion .

\*C effects on latent factors constrained to zero in Model 3 because these were not significantly different from zero in Model 1.
