# Supplementary material
Source: publisher figshare collection journal article supplement (https://asha.figshare.com/articles/dataset/_/14963922)
Supplement: Supplementary file 5 [file 1]

**Supplemental Material S4.** Fit statistics comparing the full model for productive language (presented in the article) and two nested submodels.

|                                                                                                                 | Chi-square test statistics |           |          | Relative fit statistics (lower score = better-fitting model) |          |
|-----------------------------------------------------------------------------------------------------------------|----------------------------|-----------|----------|--------------------------------------------------------------|----------|
|                                                                                                                 | <i>-2LL</i>                | <i>df</i> | <i>p</i> | AIC                                                          | BIC      |
| <b>Model 1.</b> Full model: decomposition of latent factors and residuals into A, C, E                          | 4708.41                    | 3715      | < .01    | -2721.59                                                     | -7974.76 |
| <b>Model 2.</b> Decomposition of latent factors only; residuals included but are not decomposed into A, C, E    | 4756.70                    | 3733      | < .01    | -2709.30                                                     | -8000.66 |
| <b>Model 3.</b> A and C effects on latent factors constrained to zero; decomposition of residuals into A, C, E* | 4745.04                    | 3727      | < .01    | -2708.96                                                     | -7989.81 |

*Note.* AIC = Akaike information criterion; BIC = Bayesian information criterion.

\*A and C effects on latent factors constrained to zero in Model 3 because these were not significantly different from zero in Model 1.
